# Supplementary material for: Machine learning and signal processing assisted differential mobility spectrometry (DMS) data analysis for chemical identification
Source: Royal Society of Chemistry journal article supplement (doi:10.1039/d2ay00723a), 2022-01-01
Supplement: d2ay00723a1.pdf [file d2ay00723a1.pdf]

## Supplementary Materials for

# Machine Learning and Signal Processing assisted Differential Mobility Spectrometry (DMS) Data Analysis for Chemical Identification

Pranay Chakraborty<sup>1</sup>, Maneeshin Y. Rajapakse<sup>1,2</sup>, Mitchell M. McCartney<sup>1,2,3</sup>, Nicholas J. Kenyon<sup>2,3,4</sup>, Cristina E. Davis<sup>1,2,3,\*</sup>

<sup>1</sup> Department of Mechanical and Aerospace Engineering, University of California Davis, Davis, CA, USA

<sup>2</sup> UC Davis Lung Center, One Shields Avenue, Davis, CA, USA

<sup>3</sup> VA Northern California Health Care System, 10535 Hospital Way, Mather, CA, USA

<sup>4</sup> Department of Internal Medicine, University of California Davis, Davis, CA, USA

\* Corresponding author: [cedavis@ucdavis.edu](mailto:cedavis@ucdavis.edu)

### 1. Dispersion plots of mixture of chemicals

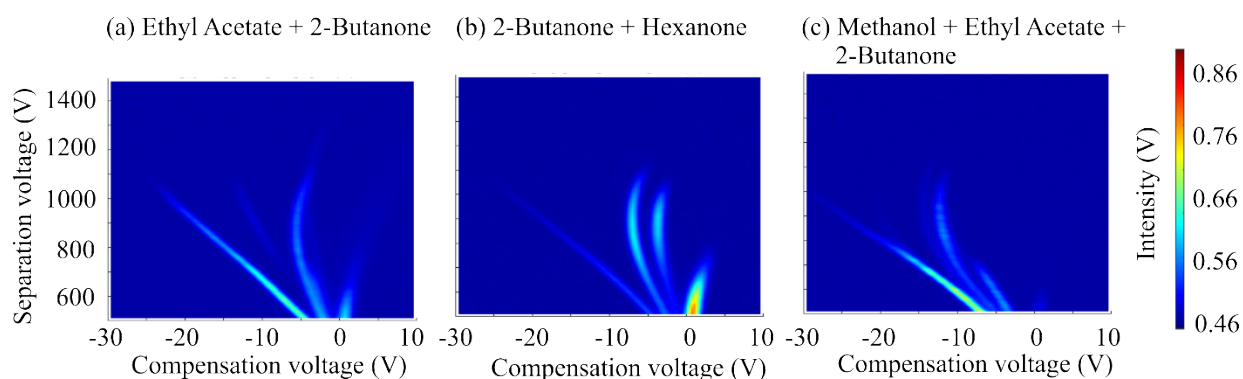

Figure S1: Dispersion plots of mixture of chemicals: (a) Ethyl Acetate + 2-Butanone, (b) 2-Butanone + Hexanone, and (c) Methanol + Ethyl Acetate + 2-Butanone.

### 2. Comparison of machine learning algorithms

Table S1: Comparison of different machine learning algorithms in identifying chemicals from the dispersion data of samples

|                      | Approach                                              | Reported prediction accuracy for testing data                   |
|----------------------|-------------------------------------------------------|-----------------------------------------------------------------|
| Rajapakse et al. [1] | Partial least squared discriminant analysis           | 0-100% (performance varied depending on the mixture complexity) |
| Yeap et al. [2]      | Support vector machine + Bag of visual words          | ~90 %                                                           |
| Li et al. [3]        | Principal component analysis + support vector machine | 66.7-80%                                                        |
| Li et al. [3]        | Convolutional neural network                          | 86.7 -100%                                                      |
| Current work         | Convolutional neural network                          | ~100 % (for the considered cases)                               |

1. Rajapakse, M.Y., et al., *Automated chemical identification and library building using dispersion plots for differential mobility spectrometry*. *Analytical Methods*, 2018. **10**(35): p. 4339-4349.
2. Yeap, D., et al., *Machine vision methods, natural language processing, and machine learning algorithms for automated dispersion plot analysis and chemical identification from complex mixtures*. *Analytical chemistry*, 2019. **91**(16): p. 10509-10517.
3. Li, H., et al., *Identification of Specific Substances in the FAIMS Spectra of Complex Mixtures Using Deep Learning*. 2021. **21**(18): p. 6160.
